# Supplementary material
Source: PubMed Central journal article supplement (PMC7864284)

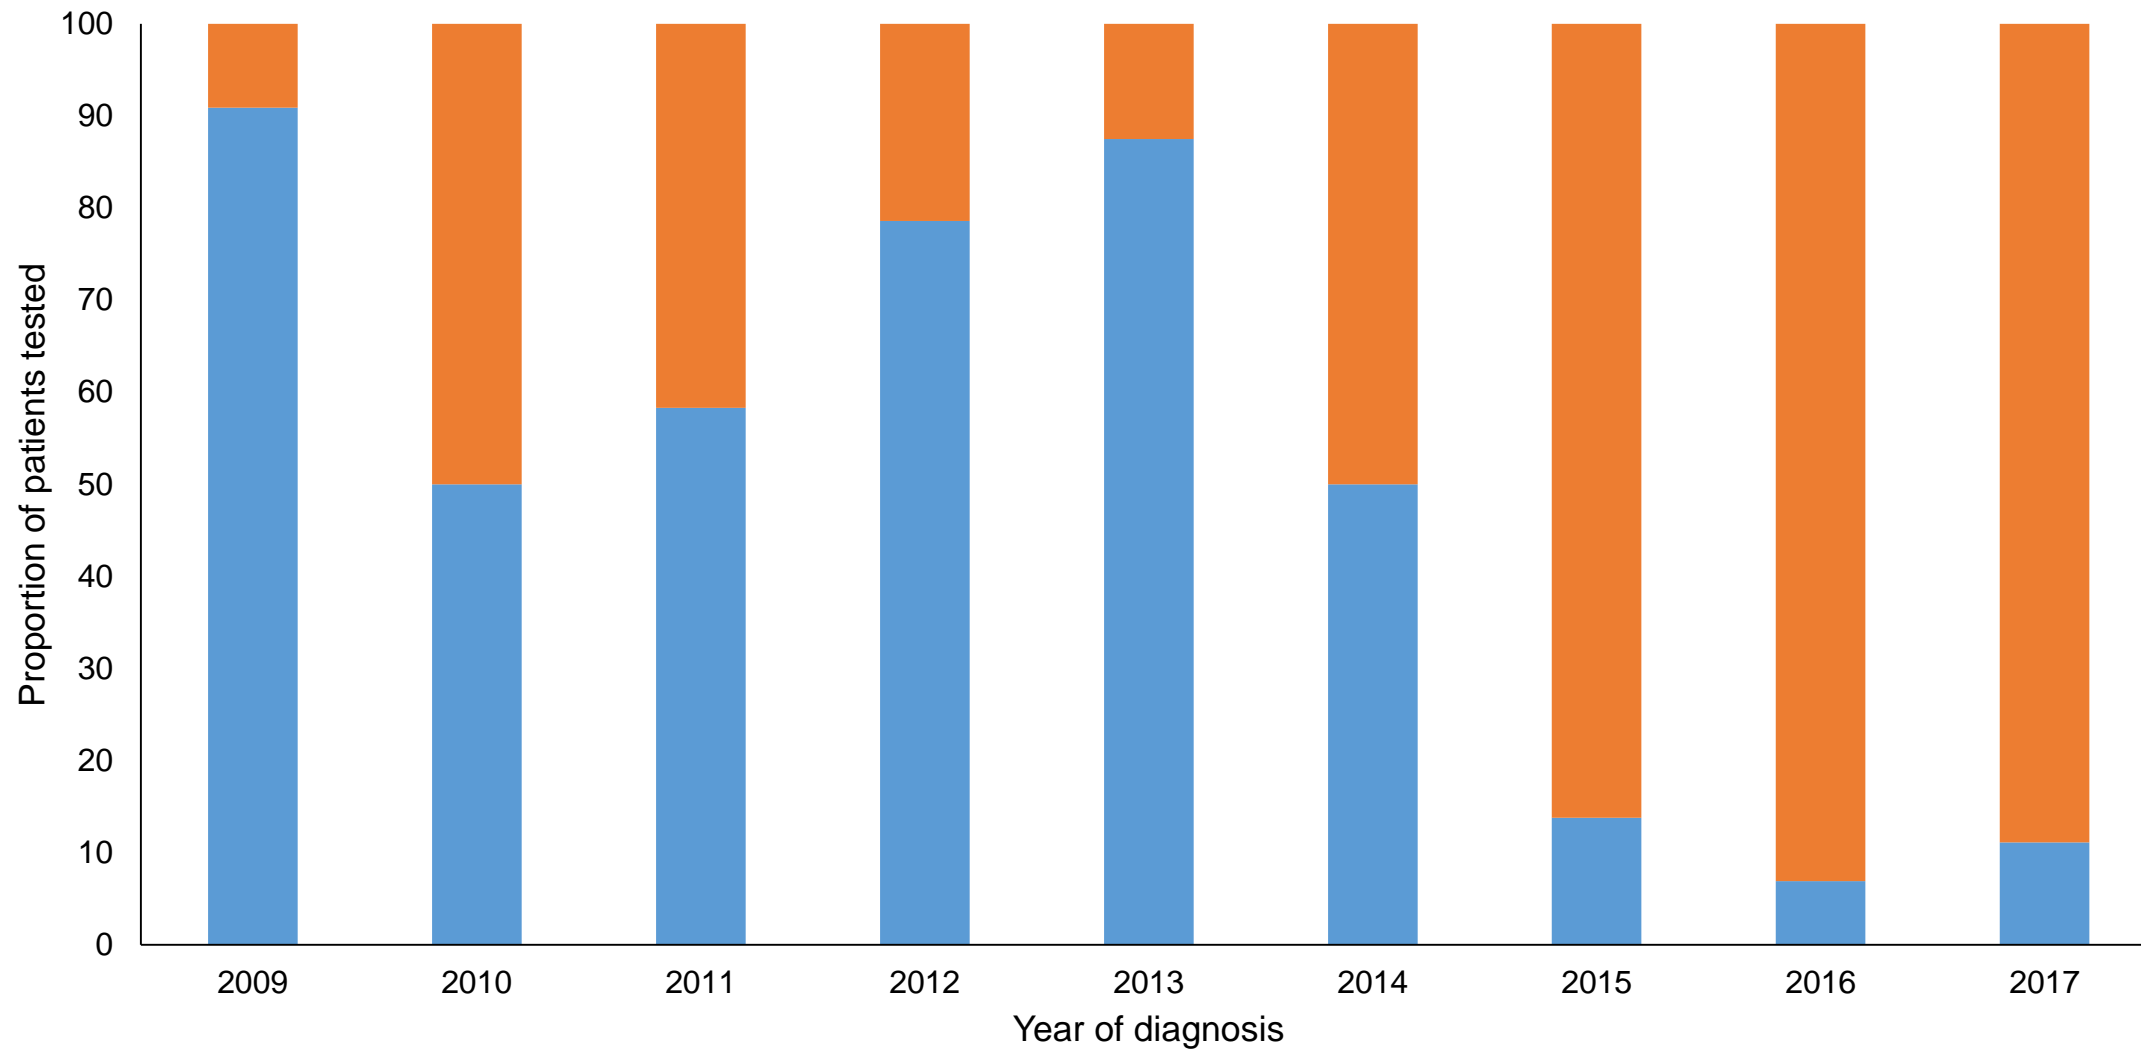

■ Gene-specific testing ■ Multigene panel testing

Supplement: NIHMS1658654-supplement-Supplementary_fig_1.pdf [file NIHMS1658654-supplement-Supplementary_fig_1.pdf]
